# Supplementary material for: The novel actin/focal adhesion-associated protein MISP is involved in mitotic spindle positioning in human cells
Source: PubMed Central journal article supplement — Cell Cycle. 2013 Apr 10;12(9):1457–71. doi: 10.4161/cc.24602 (PMC3674073; doi:10.4161/cc.24602), 2013-04-10
Supplement: cc-12-1457-s01.pdf [file cc-12-1457-s01.pdf]

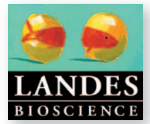

## **Supplemental Material to:**

**Bettina Maier, Michael Kirsch, Simon Anderhub,  
Hanswalter Zentgraf and Alwin Krämer**

**The novel actin/focal adhesion-associated protein FASP is  
involved in mitotic spindle positioning in human cells**

**2013; 12(9)**

**<http://dx.doi.org/10.4161/cc.24602>**

**<http://www.landesbioscience.com/journals/cc/article/24602>**

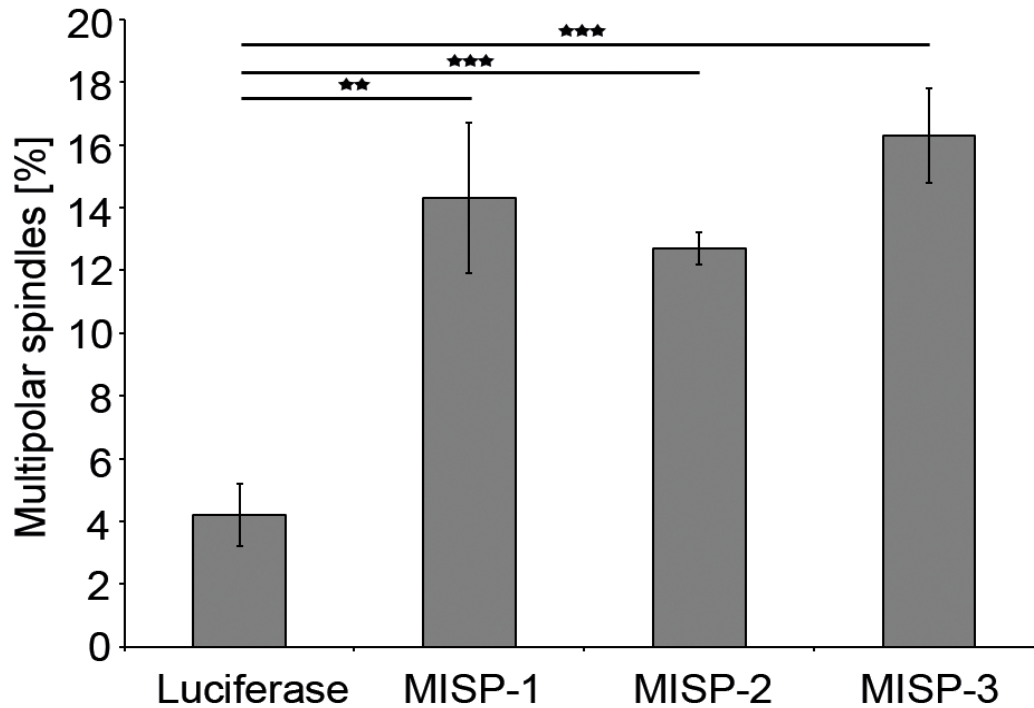

**Figure S1. Depletion of MISP by different siRNAs induces multipolar mitotic spindles.** RNAi-mediated depletion of MISP by three different MISP-siRNAs (MISP-1, MISP-1, MISP-3) significantly increases the amount of UPCI:SCC114 cells with multipolar mitotic spindles as compared to cells transfected with a siRNA against luciferase. Cells were treated with luciferase- or MISP-siRNAs for 48 h and immunostained with an antibody to  $\alpha$ -tubulin. The graph shows the average of three independent experiments; mean  $\pm$  SD.

**A**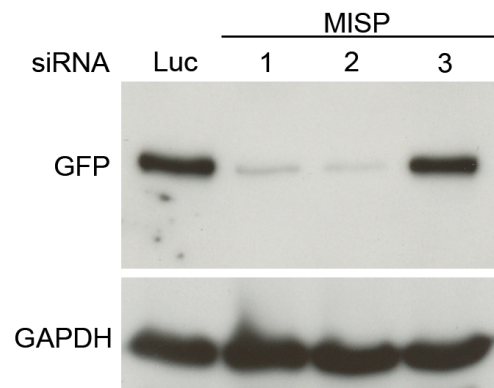**B**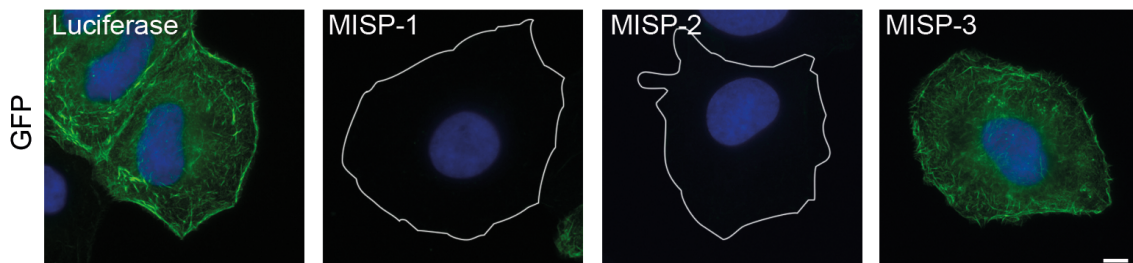

**Figure S2. MISP-3 siRNA does not target exogenously overexpressed GFP-MISP.** (A) Lysates of GFP-MISP-U2OS cells immunoblotted with an antibody to MISP (C118). GFP-MISP expression is clearly reduced by siRNAs targeting the coding region of MISP (MISP-1 and MISP-2) but not by a siRNA which is directed against the 3'UTR of MISP (MISP-3). Cells were transfected with indicated siRNAs for 48 h and expression of GFP-MISP was induced 24 h after siRNA-transfection for further 24 h. (B) Fluorescence microscopy of GFP-MISP-U2OS also reveals that GFP-MISP is depleted by siRNAs MISP-1 and MISP-2 but not by siRNA MISP-3. Cells were transfected with indicated siRNAs for 48 h and expression of GFP-MISP was induced 24 h after siRNA-transfection for further 24 h. Cell boundaries are depicted as white lines. Scale bar, 10  $\mu$ m.

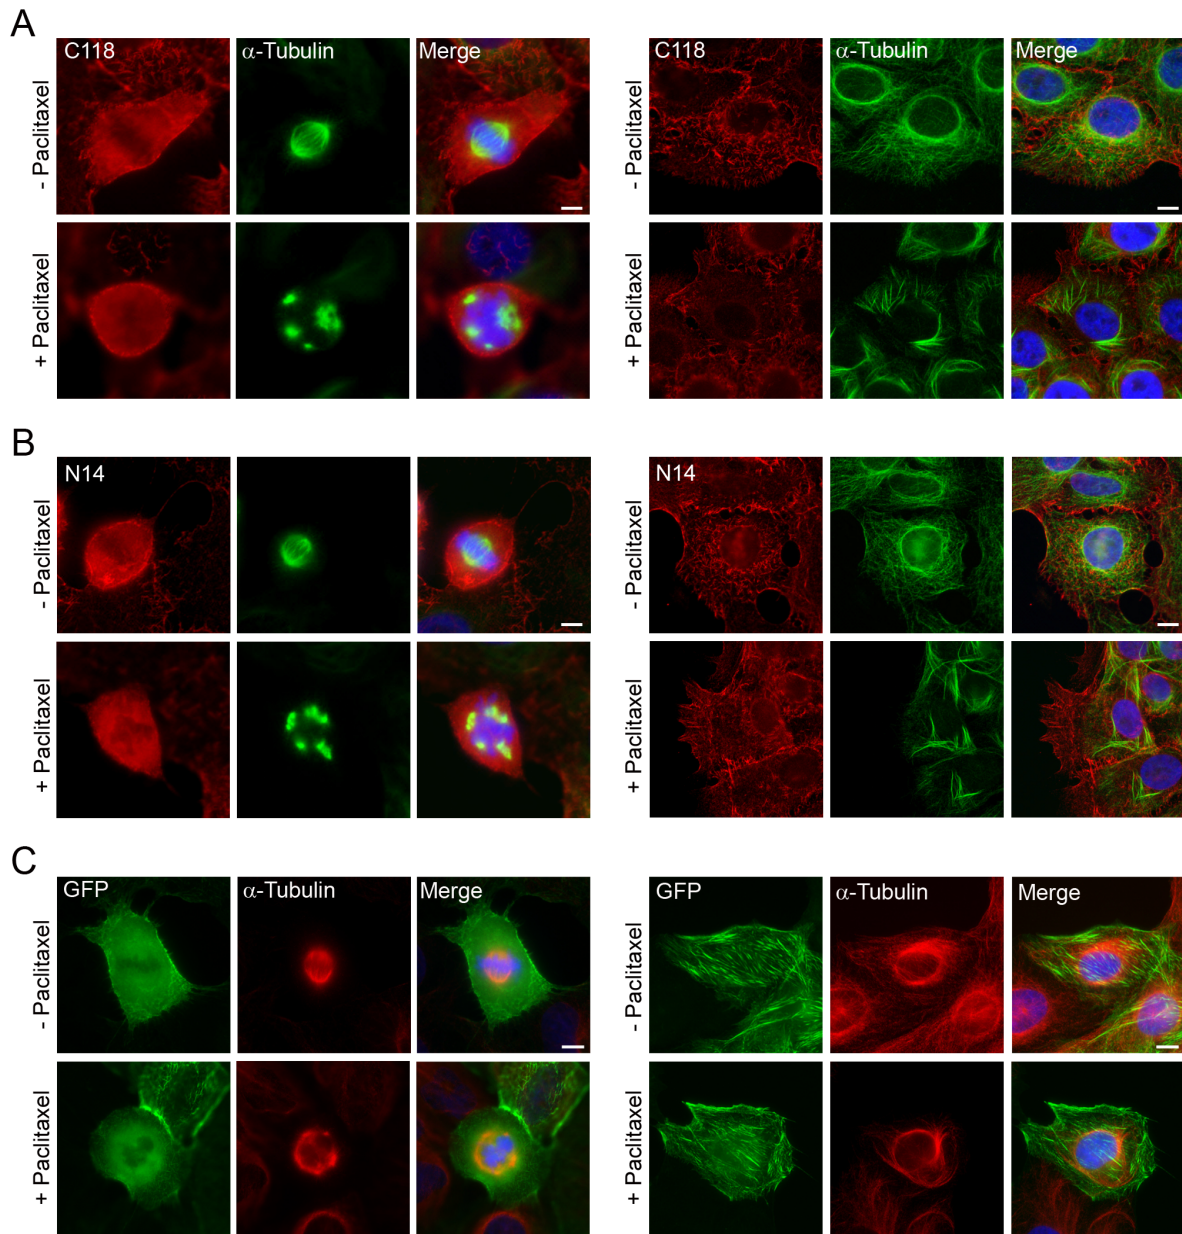

**Figure S3. MISP does not localize to microtubules.** (A) Co-immunostaining of MISP with antibodies directed against the C-terminus of the protein (C118) and  $\alpha$ -tubulin does not reveal a colocalization to mitotic spindles (left panel) or interphase microtubules in UPCI:SC114 cells in the absence (-) or presence (+) of the microtubule-stabilizing agent paclitaxel. Scale bar, 10  $\mu$ m. (B) Co-immunostaining of MISP with antibodies directed against the N-terminus of the protein (N14) and  $\alpha$ -tubulin does not reveal a colocalization of MISP to neither mitotic spindles (left panel) nor interphase microtubules in UPCI:SC114 cells in the absence (-) or presence (+) of paclitaxel as well. Scale bar, 10  $\mu$ m. (C) GFP-MISP does not colocalize to mitotic spindles (left panel) or interphase microtubules (right panel) in GFP-MISP-U2OS cells in the absence (-) or presence of (+) of paclitaxel. Scale bar, 10  $\mu$ m.
